# Supplementary material for: Rapid fabrication of a dual-scale micro-nanostructured superhydrophobic aluminum surface with delayed condensation and ice formation properties
Source: Royal Society of Chemistry journal article supplement (doi:10.1039/c9sm01256g), 2019-01-01
Supplement: c9sm01256g1.pdf [file c9sm01256g1.pdf]

## Supporting information

### **Rapid Fabrication of Dual-Scale Micro-nanostructured Superhydrophobic Aluminum Surface with Delayed Condensation and Ice Formation Properties**

**Sumit Barthwal,<sup>a</sup> and Si-Hyung Lim<sup>\*,b</sup>**

<sup>a</sup> Nanomechatronics Lab, Kookmin University, Seoul 136-702, South Korea

<sup>b</sup> School of Mechanical Engineering, Kookmin University, Seoul 136-702, South Korea

**Corresponding author.** Tel.: +82-2-910-4672. E-mail address: shlim@kookmin.ac.kr

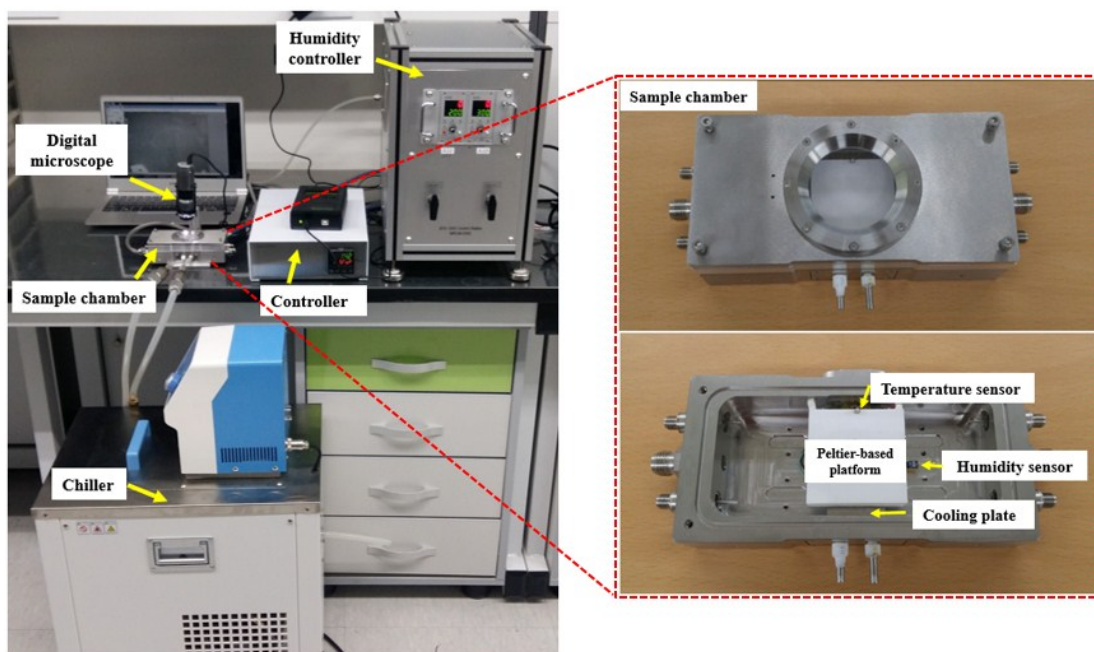

**Fig. S1.** The layout of the anti-icing set-up used in the present study.

**Table S1.** Comparison of WCA and SA of the different Al surfaces.

| Al surfaces                        | WCA (°) | WSA (°) |
|------------------------------------|---------|---------|
| <b>Bare</b>                        | 75      | -       |
| <b>Bare</b> (PDMS coating)         | 113     | -       |
| <b>MN-surface</b> (Before coating) | 0       | -       |
| <b>MN-surface</b> (SLIPS)          | 104     | 11      |
| <b>MN-surface</b> (PDMS-SHS)       | 161     | 3       |

## **Supplementary Video clips (Movie S1 – S2)**

### **Supplementary Video S1**

This movie clip captures the coalescence and the self-propelled jumping behavior of the condensed water droplets on the PDMS coated superhydrophobic MN-structured (PDMS-SHS) Al surface at  $-5\text{ }^{\circ}\text{C}$ , under a RH of  $80\% \pm 5\%$ .

### **Supplementary Video S2**

The movie shows the slippery behavior motion of the condensed water droplets on the SLIPS surface at  $-5\text{ }^{\circ}\text{C}$ , under a RH of  $80\% \pm 5\%$ . The condensed droplets merged with the neighboring water droplets and grow bigger.
